# Supplementary material for: Circadian and dark-pulse activation of orexin/hypocretin neurons
Source: PubMed Central journal article supplement (PMC2632999; doi:10.1186/1756-6606-1-19), 2008-12-03

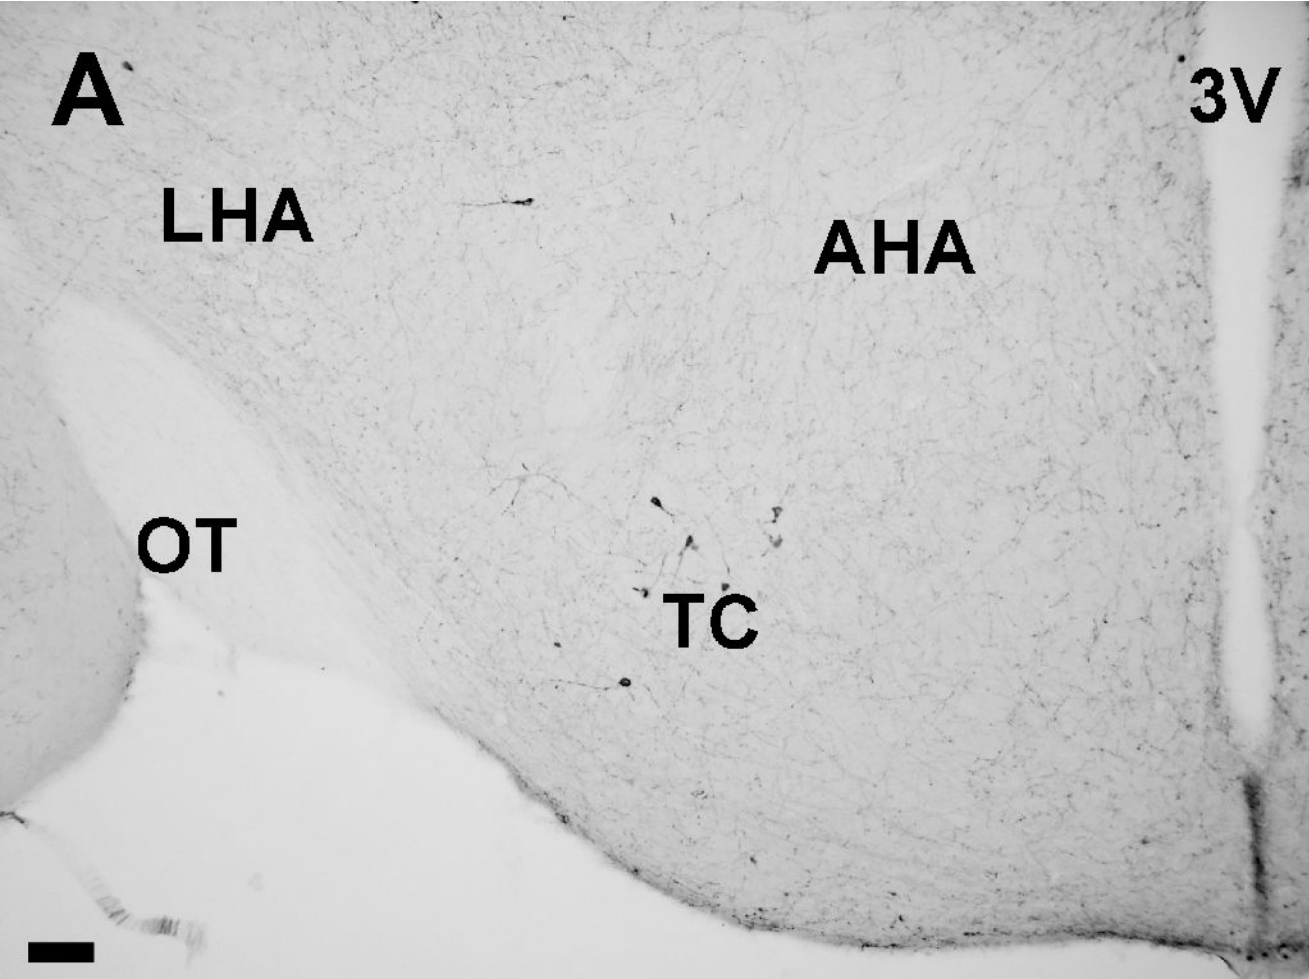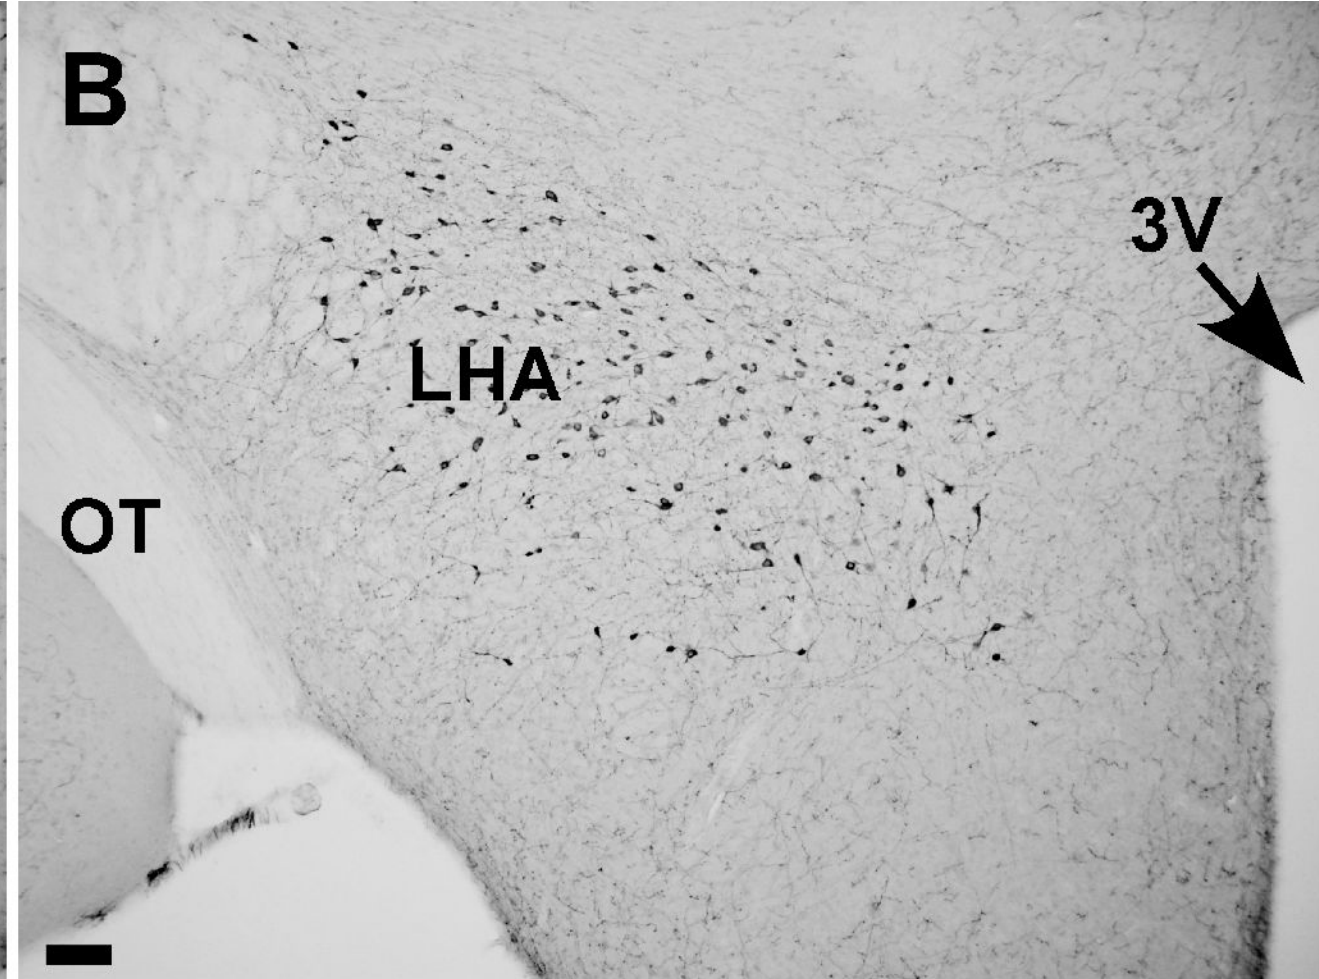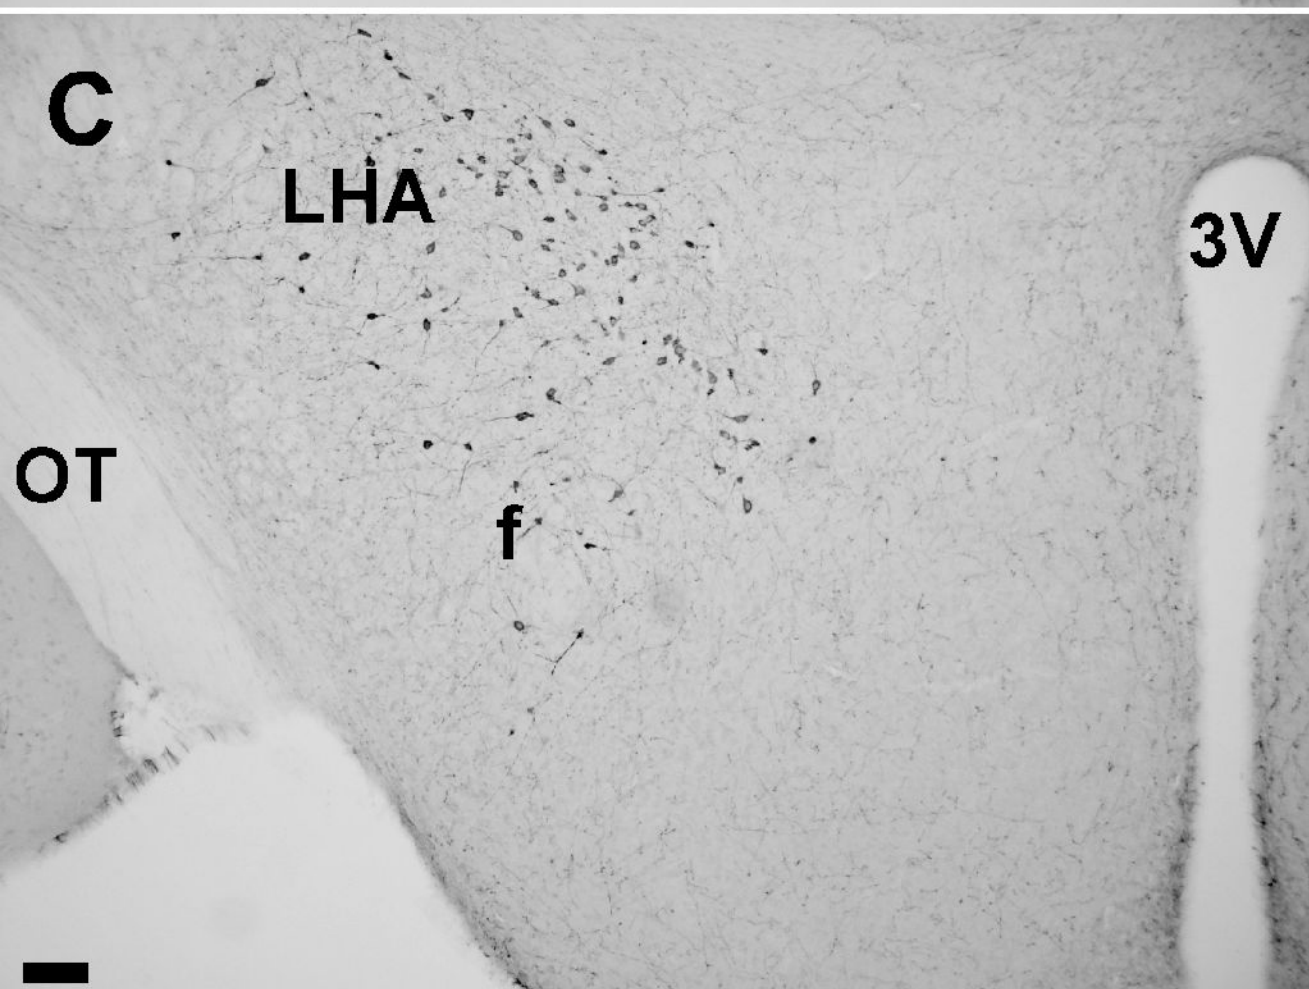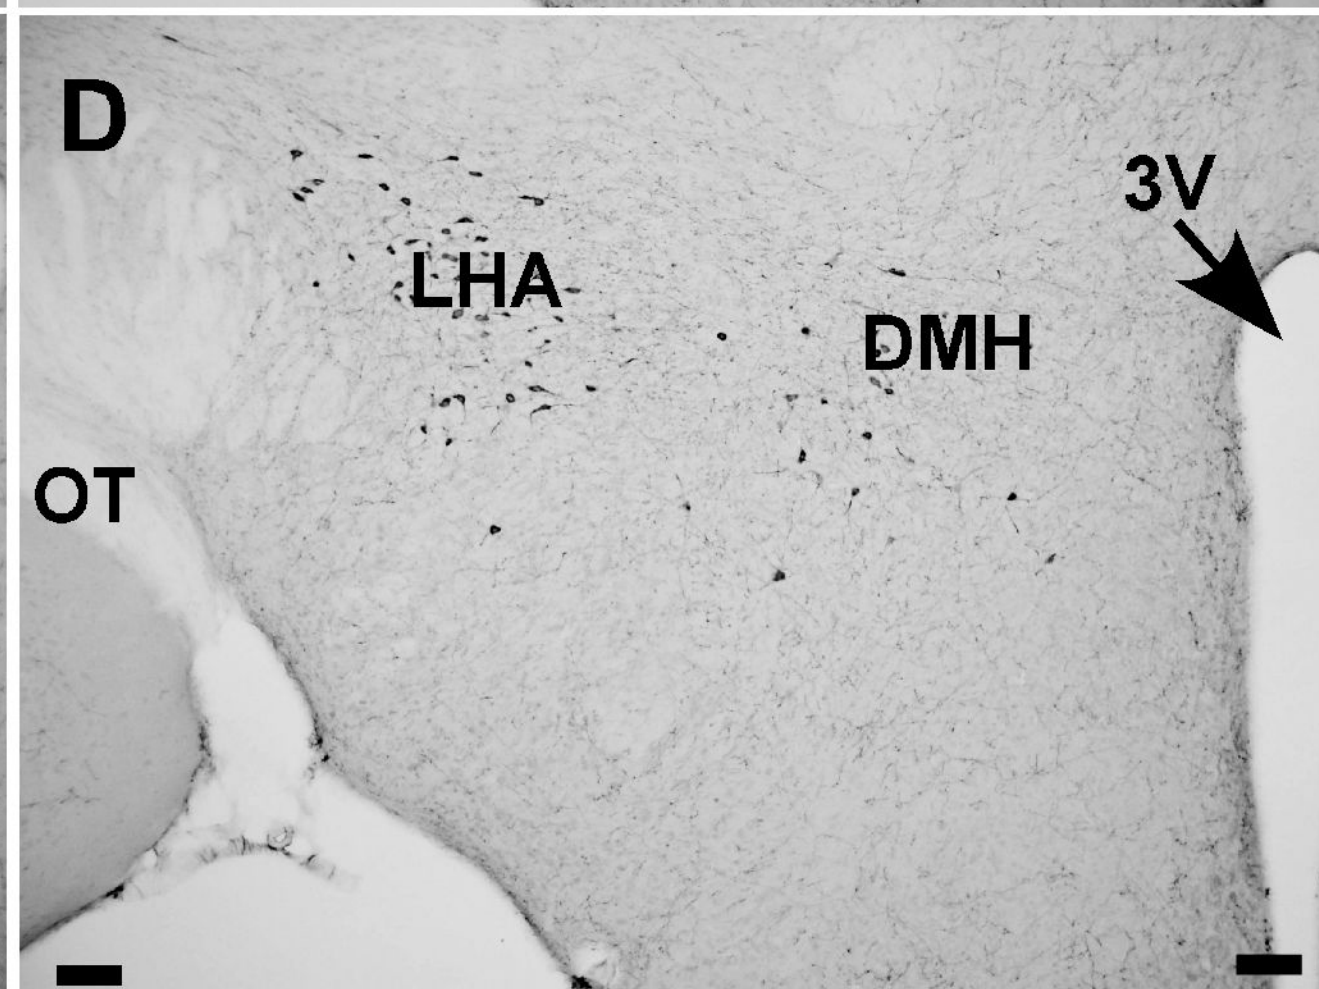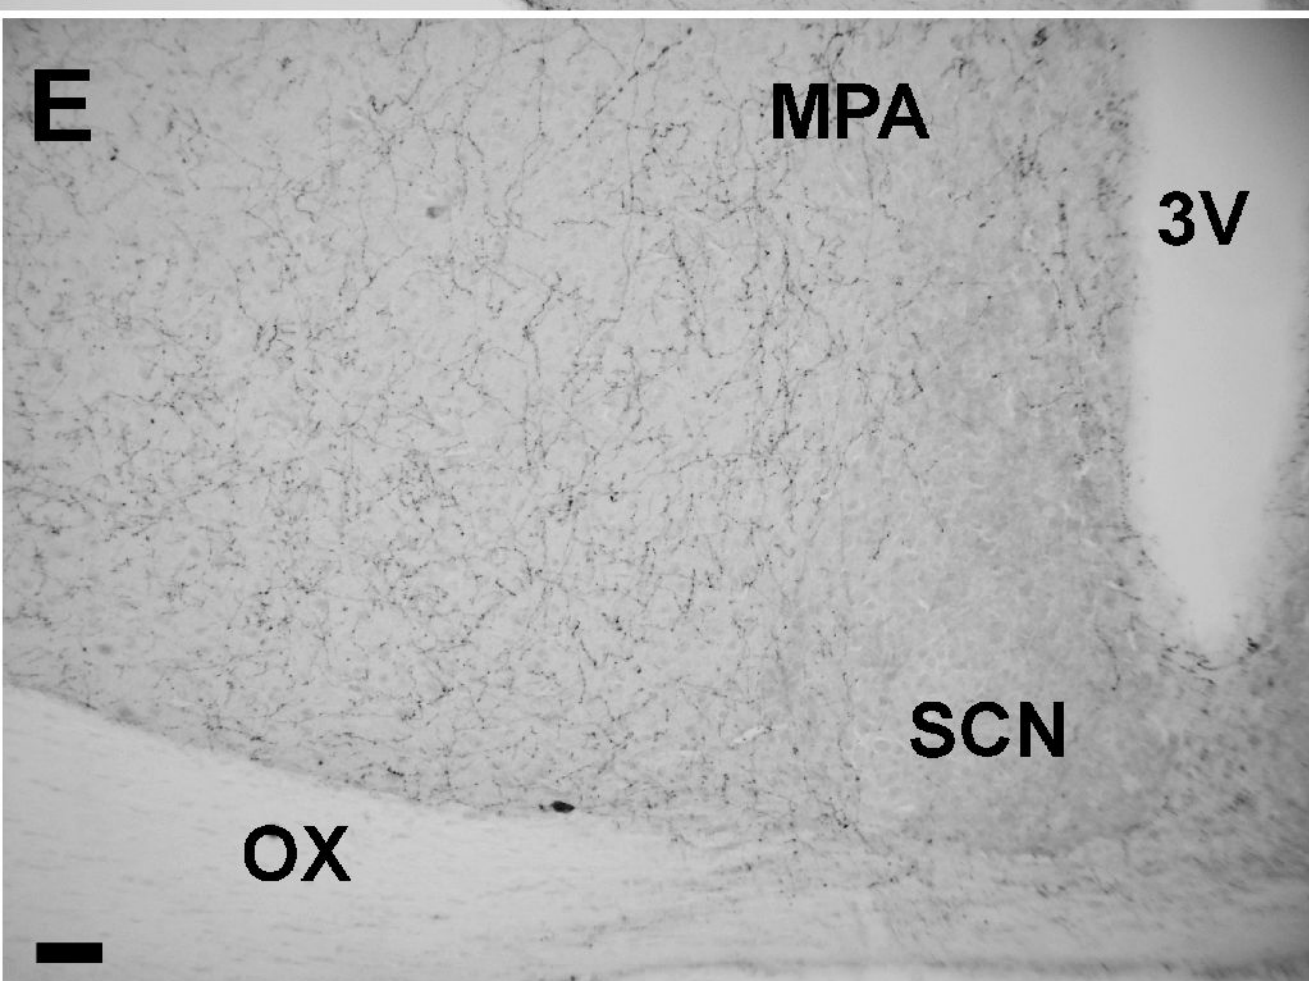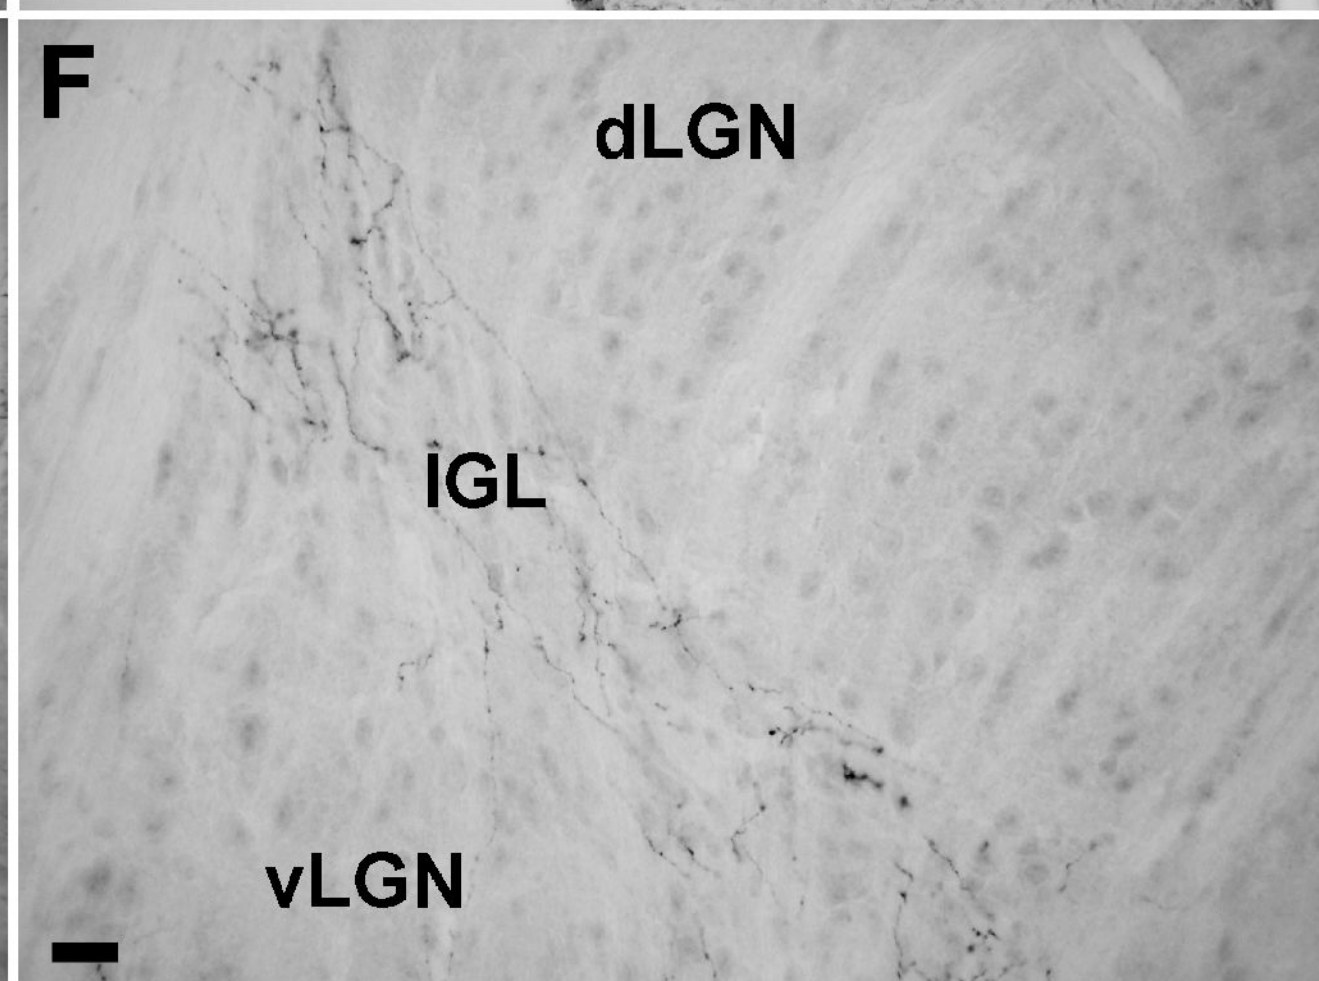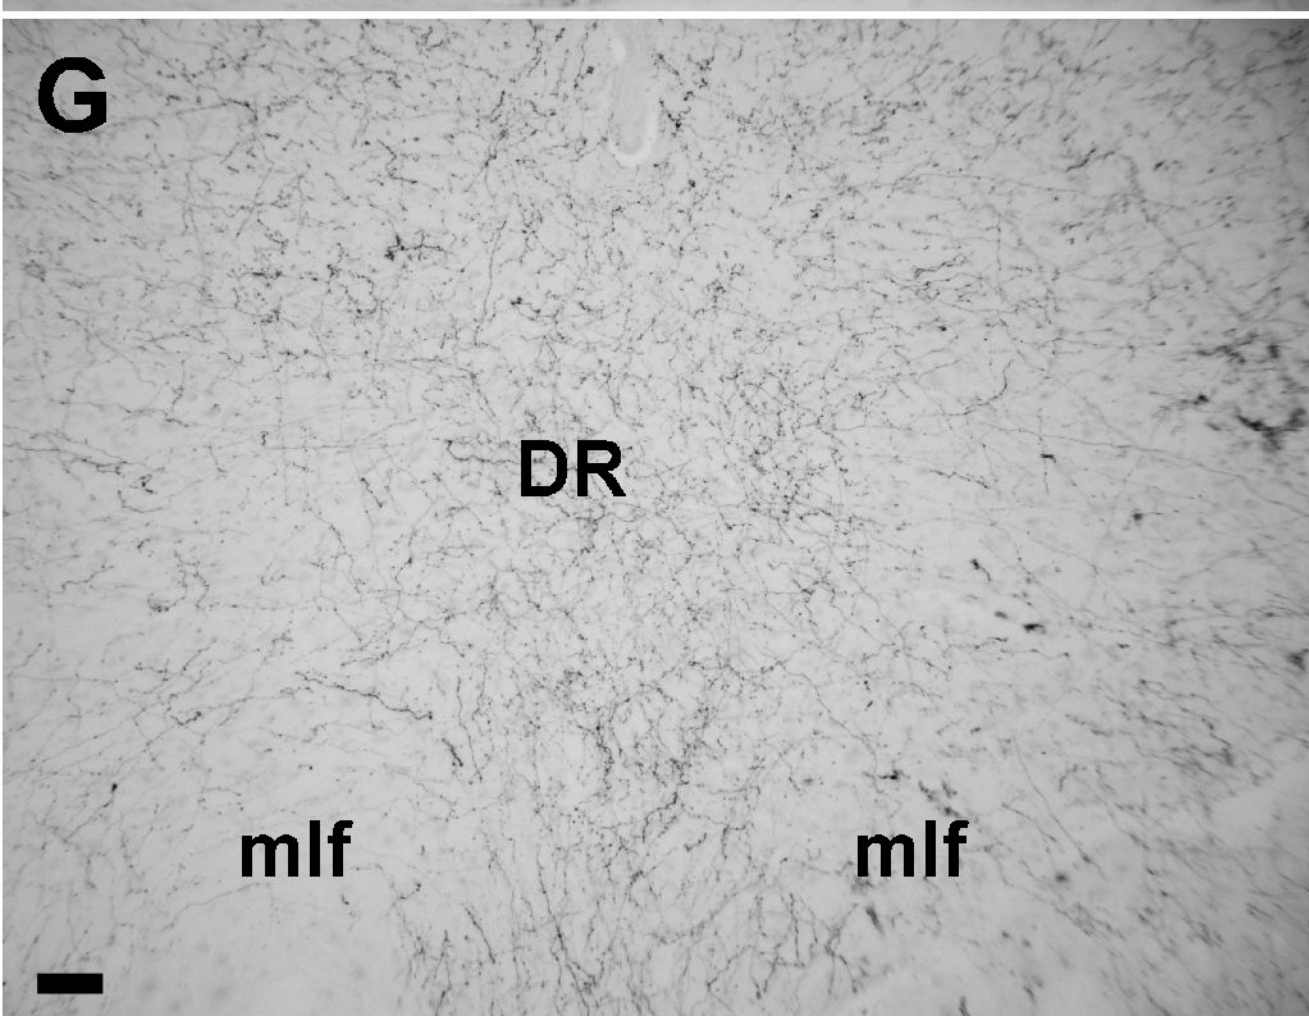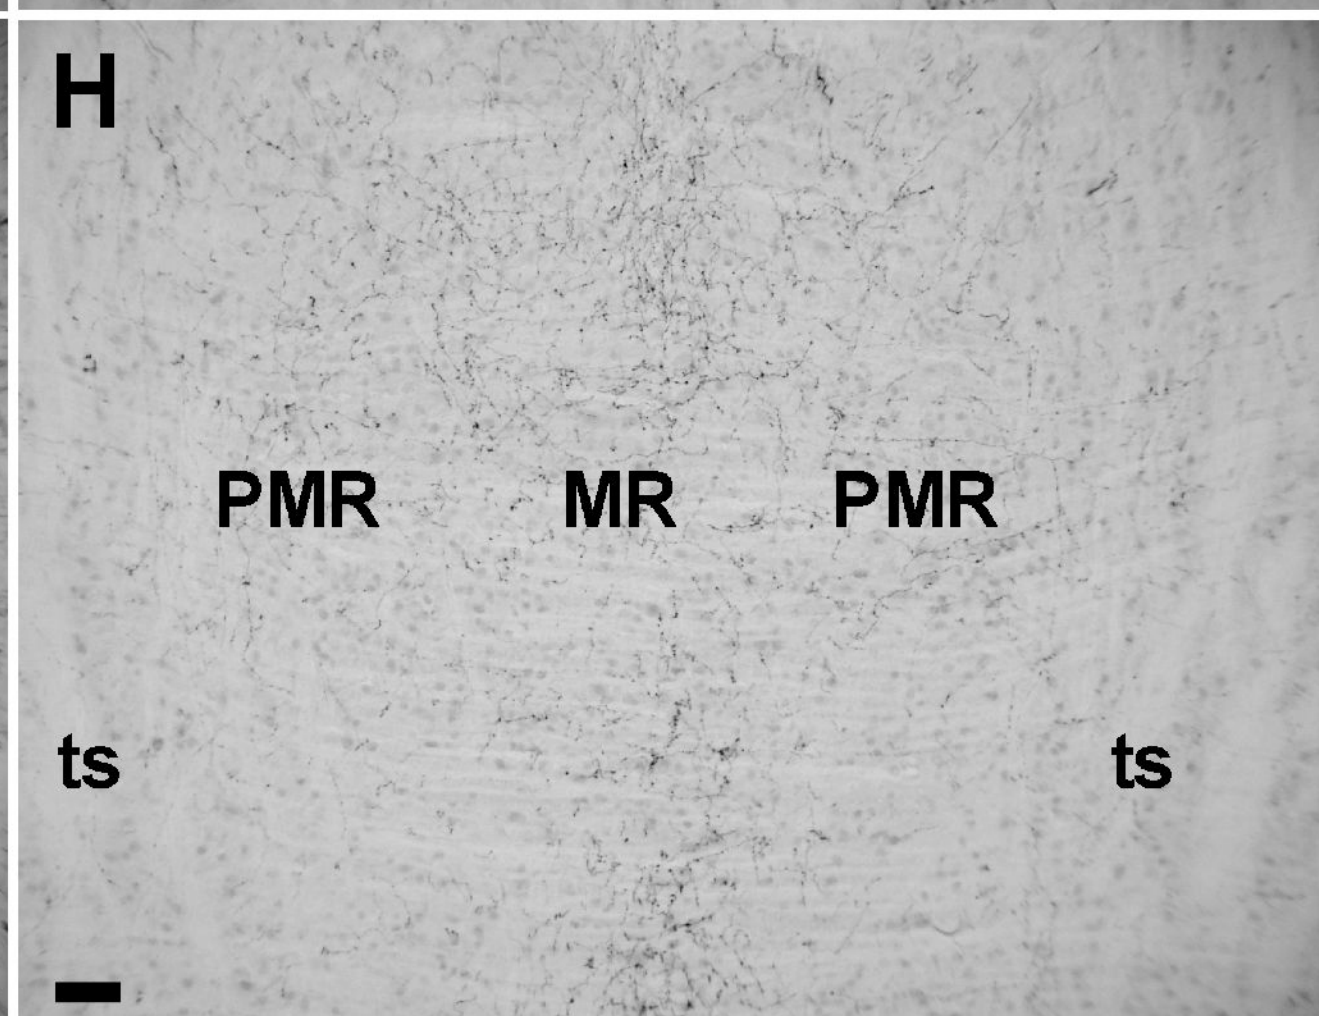

Supplement: 1756-6606-1-19-S1.pdf [file 1756-6606-1-19-S1.pdf]
